# Supplementary material for: Evident PM 2.5 Drops in the East of China due to the COVID-19 Quarantines in February
Source: Copernicus journal article supplement (doi:10.5194/acp-2020-695), 2020-08-31
Supplement: Supplementary file [file acp-2020-695-AC1-supplement.pdf]

## **Reply to Reviewer #1:**

General comments: The authors simulate the decline in PM<sub>2.5</sub> concentration that resulted from emissions reductions during the COVID-19 pandemic using GEOS-chem. They use 1985 and 2010 emissions to simulate the 2015-20 period. They obtain reasonably good correlations between simulated and observed daily mean PM<sub>2.5</sub> and show that COVID-19 led to a significant decline. The study is interesting, in the sense that knowing how much PM<sub>2.5</sub> declined due to COVID-19 after other factors are accounted for is useful, and well-timed. The physical and chemical processes responsible for PM<sub>2.5</sub> concentrations during COVID are discussed to some extent. In response to my comments during the access review, the authors added two new subfigures elucidating the role of meteorology in generating PM<sub>2.5</sub>, and they added a literature review of chemical mechanisms for the formation of the remaining pollution. **These additions are valuable, but in my opinion further major revisions are still needed before the paper can be published**, as follows:

### **1. Abstract and introduction.**

**The abstract and introduction should be refocused towards atmospheric processes. While atmospheric processes are discussed (lines 30-37 and 42-49), for Atmospheric Chemistry and Physics they should be the main topic of the introduction. The main topic of the introduction is currently Chinese air quality and COVID, but the paper is about the disentangling effects of meteorology from the effects of the COVID lockdown, and so there needs to be more detail on meteorology in China. This is done very well in the introduction to Yin and Zhang (2020); perhaps some more detail specifically on how 2020 meteorology differs from the climatology would distinguish the two studies? You say that variations in the surface wind, boundary layer height and moisture conditions affect air quality, which is not wrong, but specifically what do they typically do in China, when, and where? The literature review also lacks detail; care should be taken to point out explicitly how this paper differs from the large number of other works on the topic. I appreciate this is difficult because of the very large number of very recent publications, but it is definitely possible to do more here.**

### ***Reply:***

Appreciate for your detailed and valuable suggestions, which helped us to improve the main thread of this manuscript.

- (1) The main differences between our submission and other publications (with

topic about the impacts of COVID-19 on PM<sub>2.5</sub>) are **whether disentangled effects of meteorology**. Adopting your suggestions, we enhanced related presentations in the Abstract and Introduction.

For example, in the introduction, we added a **detailed analysis of meteorological conditions about typical haze pollution events in the Beijing-Tianjin-Hebei region in December 2016**, and explained how the variations of surface wind, boundary layer height and moisture conditions influenced these severe haze events.

(2) **More specific analysis about the changes in meteorological conditions in February 2020** has also been added. Furthermore, their relationships and regressions against PM<sub>2.5</sub> were also discussed in lines 175-186, which were also **closely connected with comment 5.3**.

***Revision:***

**Lines 12-14:** Relative to both of February 2017 and climate mean, anomalous southerlies and moister air occurred in the east of China in February 2020, which caused considerable PM<sub>2.5</sub> anomalies. Thus, it is a must to disentangle the contributions of stable meteorology from the effects of the COVID-19 lockdown.

**Lines 41-44:** Climate variability notably influences the formation and intensity of haze pollution in China.....During December 16th-21st 2016, although most aggressive control measures for anthropogenic emissions were implemented, severe haze pollution with PM<sub>2.5</sub> concentrations  $\approx 1100\mu\text{g m}^{-3}$  still occurred and covered 710,000km<sup>2</sup>. The continuous low surface wind speed of less than 2ms<sup>-1</sup>, high humidity above 80% and strong temperature inversion lasting for 132h caused the rebound of wintertime PM<sub>2.5</sub> in 2016 (Yin and Wang, 2017).

**Lines 48-52:** From February 8 to 13 2020, North China suffered severe pollutions, with maximum daily PM<sub>2.5</sub> exceeding 200 $\mu\text{g m}^{-3}$ . During this period, weak southerly surface winds lasted for nearly 5 days, relative humidity was close to 100%, and atmospheric inversion reached more than 10°C. Although pollution emissions from basic social activities have been reduced, heavy pollution still occurred when adverse meteorological conditions characterized by stable air masses appeared (Wang et al.,

2020).

## 2. Data description

**What technology is usually used to measure PM<sub>2.5</sub> for this dataset? When I tried the URL it didn't work. Please reference the dataset more thoroughly.**

### *Reply:*

The old URL is past-due, and we have updated the **new URL as <https://quotsoft.net/air/>**. We give a more detailed introduction to the cited dataset and explain the **measurement technology** of PM<sub>2.5</sub> in this dataset. The PM<sub>2.5</sub> data were monitored every 5 min using two methods: a tapered element oscillating microbalance (TEOM) and  $\beta$ -rays which were operated **under the China National Quality Control** (HJ/T 193-2005) and (GB3095-2012).

HJ/T 193-2005: Automated methods for ambient air quality monitoring

GB3095-2012: Ambient air quality standards

### *Revision:*

**Lines 70-73:** PM<sub>2.5</sub> concentration data from 2015 to 2020 were acquired from the China National Environmental Monitoring Centre (<https://quotsoft.net/air/>). The monitoring network expanded from 1500 sites in 2015 to 1640 sites in 2020, covering approximately 370 cities nationwide. The PM<sub>2.5</sub> data were monitored every 5 min using two methods: a tapered element oscillating microbalance and  $\beta$ -rays which were operated under the China National Quality Control.

## 3. Model description

**This section needs a description of how the model represents aerosol microphysics. The model evaluation presented at the end of this section deserves considerably more detailed study in its own section what are the biases in the model and how might they affect the subsequent analysis? Unless you can reference other studies evaluating an identical model configuration?**

### *Reply:*

The description of how the model represents **aerosol microphysics were illustrated in lines 80-85, according to the official website of GEOS-Chem**. The model configurations were **default and similar with many previous studies** and the

evaluations of model performances were considerably improved in the following two ways and were documented in a separated paragraph (i.e., Lines 86-101).

(1) With the configuration we used, **comparisons between the observed and simulated** PM<sub>2.5</sub> concentrations in Feb 2017 were added as new Figure S1a and associated analysis were in lines 89-96. Obviously, mean values of simulated PM<sub>2.5</sub> were **consistent with the observations** (Figure S1a). The percentage of standard error / mean equals **5.8% (4.6/79.6) in NC, 7.0% (3.9/55.6) in YRD and 5.4% (3.7/70.8) in HB**, indicating the good performance of reproducing the polluted conditions. The biases possibly affected the subsequent results and brought uncertainties to some extent. We also admitted the simulated biases were larger in the south of China, which was consistent with other studies and might **explained the little positive values** in Figure 3c (closely connected with comment 7.2).

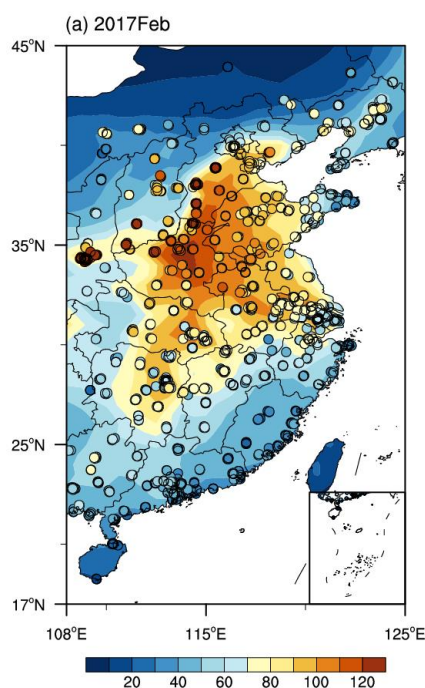

**Figure S1a.** Spatial distribution of observed (dots) and GEOS-Chem simulated (shading) PM<sub>2.5</sub> in February 2017.

Furthermore, the **simulated spatial distribution** was also similar to that of observations in Feb 2017 with **spatial correlation coefficient = 0.78**. The ability of GEOS-Chem to reproduce the daily variations of PM<sub>2.5</sub> in Feb 2020 was also introduced in the old version as below.

83 changes in February 2020 under a substantial reduction in emissions because of COVID-19 quarantines. In North China (NC),  
 84 Yangtze River Delta (YRD) and Hubei Province (HB), the correlation coefficients between daily PM<sub>2.5</sub> observations and  
 85 simulated data under 2010 (1985) emission scenario reached **0.83 (0.82), 0.67 (0.63), and 0.79 (0.73)**, respectively. For example,  
 86 in NC, the simulation could **well simulate severe haze events (e.g., from 8–14 and 18–22 February)** and good air quality events  
 87 (e.g., from 15–19 February), reflecting that it has ability to accurately capture the change of meteorological conditions (Fig.

(2) The default configuration of GEOS-Chem were adopted by many previous publications and we also introduced related evaluations in the revised manuscript. Dang and Liao directly evaluated the capacity of models in PM<sub>2.5</sub> simulations by calculating the normalized mean bias. The simulated spatial patterns of 2013-2017 winter PM<sub>2.5</sub> were agreed well with the measurements, which was **similar to our evaluations in Figure S1a**. The scatterplot of simulated versus observed **seasonal mean PM<sub>2.5</sub> concentrations** showed **overestimated** PM<sub>2.5</sub> concentrations with a normalized mean bias (NMB) of +8.8 % for all grids and an NMB of +4.3 % for BTH (Figure R1a). They also compared the simulated and observed **daily mean PM<sub>2.5</sub> concentrations** at the Beijing, Shanghai, and Chengdu grids, which represent the three most polluted regions of BTH, YRD, and the Sichuan Basin, respectively. The model has **a low bias in Beijing** with an NMB of **−9.2 %** and is unable to predict the maximum PM<sub>2.5</sub> concentration in some cases. For Shanghai and Chengdu, the model **has high biases with NMBs of 18.6 % and 28.7 %**, respectively (Figure R1b). This evaluation also showed a bigger simulated bias in the south of China. The model, however, can capture the spatial distributions and seasonal variations of each aerosol species despite of the biases in simulated concentrations.

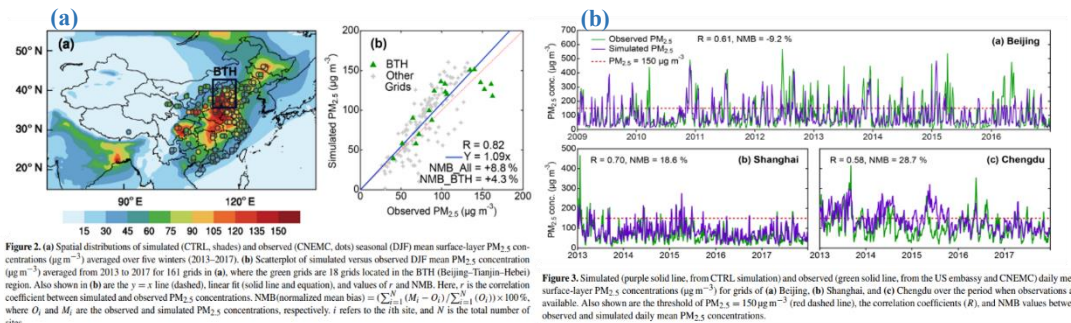

**Figure R1. Key Figures in Dang and Liao (2019).**

**Related references:**

Dang, R., and Liao, H.: Severe winter haze days in the Beijing-Tianjin-Hebei region

from 1985 to 2017 and the roles of anthropogenic emissions and meteorology, *Atmos. Chem. Phys.*, 19, 10801–10816, 2019.

***Revision:***

**Line 74:** 2.2 GEOS-Chem description, evaluation and experimental design

**Lines 80-85:** Aerosol thermodynamic equilibrium is computed by the ISORROPIA package, which calculates the gas–aerosol partitioning of the sulfate–nitrate–ammonium system (Fountoukis and Nenes, 2007). Heterogeneous reactions of aerosols include the uptake of HO<sub>2</sub> by aerosols (Thornton et al., 2008), irreversible absorption of NO<sub>2</sub> and NO<sub>3</sub> on wet aerosols (Jacob, 2000), and hydrolysis of N<sub>2</sub>O<sub>5</sub> (Evans and Jacob, 2005). Two alternate simulations of aerosol microphysics are implemented in GEOS-Chem: the TOMAS simulation (Kodros and Pierce, 2017) and the APM simulation (Yu and Luo, 2009).

**Lines 86-96:** GEOS-Chem model has been widely used to examine the historical changes in air quality in China and quantitatively separate the impacts of physical-chemical processes. Here, we simulated the PM<sub>2.5</sub> concentrations in February 2017 and evaluated the performance of GEOS-Chem (Figure S1a). The values of mean square error / mean equals were 5.8%, 7.0% and 5.4% in North China (NC), Yangtze River Delta (YRD) and Hubei Province (HB), respectively, indicating the good performance of reproducing the haze-polluted conditions. The absolute biases were larger in the south of China, which was consistent with Dang and Liao (2019). They also compared the simulated and observed daily mean PM<sub>2.5</sub> concentrations at the Beijing, Shanghai, and Chengdu grids, which had a low bias in Beijing and high biases in Shanghai and Chengdu, respectively. The simulated biases possibly affected the subsequent results and brought uncertainties to some extent. The simulated spatial distribution of PM<sub>2.5</sub> was also similar to that of observations with spatial correlation coefficient = 0.78. We further verified whether the simulations could capture the roles of meteorological changes in February 2020 under a substantial reduction in emissions because of COVID-19 quarantines.....

#### 4. Method to quantify influence of quarantine

4.1 Running GEOS-chem for two different emissions scenarios seems like a good idea, and it's good to see that the changes due to meteorology are consistent between years. However, did you consider the physical justification for a linear decomposition? If we consider, crudely, the Chinese airshed as a simple chemical reactor in steady state, then the linear decomposition would not be obviously appropriate (though it may be a reasonable approximation) since the steady-state concentration is the product of the emissions and the loss lifetime.

##### *Reply:*

The linear decomposition is definitely a **reasonable and feasible approximation** and must have differences with the reality due to complex atmospheric chemical processes (also involving meteorology-emission interactions). The reasons for selecting the linear hypothesis were as follows.

(1) **From 2013 to 2019**, the impacts of emission reduction were approximately linear, which might related to the **enhanced and reinforced control measures in China**. Because the signal of emissions reduction in China had been **particularly strong since 2013**, it could be easily detected and the assumption of a linear reduction in pollution caused by emission reduction was **applicable in China in the past few years**. This linear approximation was employed by many previous studies (Geng et al. 2017; Zheng et al. 2018) and even by **national assessments aimed to evaluate the effects of Action Plan of Air Pollution Prevention and Control from 2013 to 2017** (Geng et al. 2020; Wang et al. 2020). We have introduced the evaluated results in lines 137-142.

(2) After disentangling the effects of meteorology, the variations in  $PM_{2.5}$  concentrations also **showed linear change** (Figure 5 in our manuscript), which laterally verified the rationality of linear approximation.

(3) Because of the significantly linear reduction of  $PM_{2.5}$  due to changing emissions, the linear decomposition or approximation became reasonable ***in China in recent years*** to some extent.

Certainly, related presentations are lack of physical explanations. We have checked many publications, and all of them have this common problem. We also cannot show you a clear physical justification and only speculated that the obvious linear change due

to emission reductions might be that the control measures in China were particularly enhanced and reinforced. In the revised versions, **we illustrated the linear decompositions were an estimated approach** and must brought some uncertainties due to ignoring the meteorology-emission interactions, the product of emissions and their loss lifetime (Lines 263-267).

***Related references:***

Geng, G., Zhang, Q., Tong, D., Li, M., Zheng, Y., Wang, S., and He, K.: Chemical composition of ambient PM<sub>2.5</sub> over China and relationship to precursor emissions during 2005–2012, *Atmos. Chem. Phys.*, 17, 9187–9203, <https://doi.org/10.5194/acp-17-9187-2017>, 2017.

Geng, G., Xiao, Q., Zheng, Y., Tong, D., Zhang, Y., Zhang, X., Zhang, Q., He, H., and Liu, Y.: Impact of China's Air Pollution Prevention and Control Action Plan on PM<sub>2.5</sub> chemical composition over eastern China, *Sci. China Ser. D.*, 62, 1872–1884, <https://doi.org/10.1007/s11430-018-9353-x>, 2020.

Wang, P., Chen, K., Zhu, S., Wang, P., and Zhang, H.: Severe air pollution events not avoided by reduced anthropogenic activities during COVID-19 outbreak, *Resour. Conserv. Recy.*, 158, <http://doi:10.1016/j.resconrec.2020.104814>, 2020.

Zheng, B., Tong, D., Li, M., Liu, F., Hong, C., Geng, G., Li, H., Li, X., Peng, L., Qi, J., Yan, L., Zhang, Y., Zhao, H., Zheng, Y., He, K., and Zhang, Q.: Trends in China's anthropogenic emissions since 2010 as the consequence of clean air actions, *Atmos. Chem. Phys.*, 18, 14095-14111, 2018

***Revision:***

**Lines 110-112:** As mentioned above, we aimed to examine the impact of the COVID-19 quarantines on PM<sub>2.5</sub> over the February 2017 level basing on an observational-numerical hybrid method. The observed PM<sub>2.5</sub> difference in February 2020 (PM<sub>dOBS</sub>) was linearly decomposed into three parts: the impacts of changing meteorology (PM<sub>dM</sub>), expected routine emissions reductions (PM<sub>dR</sub>) and COVID-19 quarantines (PM<sub>dC</sub>), which was a reasonable approximation.....

**Lines 263-267:** Furthermore, during the calculation process, the observed PM<sub>2.5</sub>



difference in February 2020 was linearly decomposed into three parts. Although this linear decomposition was reasonable in China in the past few years, we must note that this approximation was a lack of considering the meteorology-emission interactions, the product of the emission, the loss lifetime and particularly the sulfate-nitrate-ammonia thermodynamics (Cai et al., 2017), which brought some uncertainties.

**4.2 Line 99 (minor comment) – I don't fully understand the “the PM<sub>2.5</sub> percentage due to changing meteorology”. Do you mean “the change in the percentage of PM<sub>2.5</sub> due to changing meteorology” here and later in the paragraph?**

**Reply:**

What we mean here is that **the percentage of changed PM<sub>2.5</sub> due to the differences in meteorology** is constant regardless of the emission level. This percentage is the **difference of simulated PM<sub>2.5</sub> between each year and 2017 under the same emission scenario divided by the simulated PM<sub>2.5</sub> in 2017**. We have changed the expression to be clearer.

**Revision:**

**Line 119:** Depending on the GEOS-Chem simulations, we found that the percentage of changed PM<sub>2.5</sub> due to the differences in meteorology remained nearly constant regardless of the emission level (Fig. S2) .....

**4.3 Line 107 – “the change in emissions resulted in a linear change in air pollution”. I don't think this is the message of the very nice Cai et al paper that you cite here. In fact, it is well established that emissions changes often do not lead to linear changes in air pollution, even though I do accept, from the evidence you present, that this is the case in China from around 2013 to 2019. The most obvious reason is the sulfate-nitrate-ammonia thermodynamics discussed by Cai et al. Naively, reducing sulfate emissions should reduce concentrations linearly, but reducing nitrate and/or ammonium emissions may not change concentrations at all, or may result in very large decreases in concentrations, depending on the regime (whether saturated by, or limited by, ammonia, for example). Similarly, reducing primary emissions may lead to more new particle formation, as discussed by others, and more secondary aerosol formation, which would also mean the decrease in number concentration is likely sub-linear. Line 197 of the manuscript points this out explicitly. New particle formation wouldn't directly affect changes in mass concentration, but it could have important indirect effects through the size dependence of aerosol dry and wet deposition rates. So while decreases in**

concentration may be linear with emissions in specific cases, and does seem to be true in China, this will not be true in general, and should be clarified. Also linearity in previous years, e.g. from 2013 to 2017, does not imply linearity in subsequent years. The linear extrapolation method used therefore brings with it a large uncertainty which should be studied in detail.

**Reply:**

Sorry for the inappropriate citation. Cai et al. paper did not show that emission reduction would lead to linear reduction of air pollution. Just as you said, **from 2013 to 2019, the impacts of emission reduction in China were approximately linear**. This linear approximation was **employed even by national assessments** aimed to evaluate the effects of *Action Plan of Air Pollution Prevention and Control* from 2013 to 2017 (Geng et al. 2020; Wang et al. 2020).

(1) Due to the implementation of clean air action, control measures have been enhanced and reinforced in China, showing a strong emission reduction signal. Therefore, **the pollutant reduction caused by emission reduction in China from 2013 to 2019 was linear**, which might be **related to the huge emission reduction**. But we didn't check for other areas, maybe not linear reduction. The link has a lot to do with the intensity of emissions reduction. Because the signal of emissions reduction in China had been particularly strong since 2013, it could **be easily detected and showed a linear reduction**.

(2) The effect of emission reduction in February 2020 was calculated as the change of PM<sub>2.5</sub> caused by **expected** routine emission reduction, **which did not actually happen**, but merely **gave an assessment of the change of PM<sub>2.5</sub> caused by emission reduction in the case of "if no COVID-19"**. Under this hypothetical assessment, the linear change was still tenable.

(3) Furthermore, what we emphasize more was **the effect of total emission reduction** (PM<sub>dR</sub> + PM<sub>dC</sub>), that was, the common utility of expected routine emissions reductions and COVID-19 quarantines. This quantity was obtained after excluding the effect of meteorological conditions, **which was completely unaffected by linear extrapolation of emission reduction**.

(4) The information revealed by Cai et al. (2017) was valuable and we discussed

**the possible impacts of sulfate-nitrate-ammonia thermodynamics** on our approach in line 267.

**Revision:**

**Lines 130-137:** According to many previous studies, the change in emissions resulted in a linear change in air pollution in China from 2013-2019 (Wang et al., 2020; Geng et al., 2020) which might be related to the huge emission reduction due to the implementation of clean air action. Because the signal of emissions reduction in China had been particularly strong since 2013, it could be easily detected and the assumption of a linear reduction in pollution caused by emission reduction was applicable in China in the past few years. Based on this approximation, we used the method of extrapolation to speculate the impact of routine emission reduction on PM<sub>2.5</sub>. We performed linear extrapolation based on known PM<sub>dR</sub> values from 2015 to 2019 to obtain PM<sub>dR</sub> in 2020 (STEP 2, Fig. S3). This PM<sub>dR</sub> in 2020 was calculated as the change of PM<sub>2.5</sub> caused by expected routine emission reduction, which did not actually happen, but merely gave an assessment in the case of “if no COVID-19”.

**Lines 265-267:** Although this linear decomposition was reasonable in china in the past few years, we must note that this approximation was lack of considering the meteorology-emission interactions, the product of the emission, the loss lifetime and particularly the sulfate-nitrate-ammonia thermodynamics (Cai et al., 2017), which brought some uncertainties.

**5.Results**

**5.1 Line 146: the description is good but some more introductory detail and referencing would be useful. For example, what is the East Asia deep trough? Please supply reference, e.g. Song et al, J. Climate 2016.**

**Reply:**

We have **added the description of the East Asia deep trough** and relevant references.

**Revision:**

**Line 170: .....**the East Asia deep trough, one of the most significant time-mean zonally

asymmetric circulation features in the wintertime Northern Hemisphere (Song et al., 2016), shifted eastwards and northwards than climate mean.....

**5.2 Line 149: This is potentially a useful result, but what is the importance of the hygroscopic growth? Its importance surely depends on whether the PM<sub>2.5</sub> measurements are of dry or of hydrated particles. If dry particles are measured, hydration might still be important if it affects deposition rates. So what is the difference in humidity and what difference to the size of typical particles would that lead to?**

***Reply:***

Fine aerosols, such as PM<sub>2.5</sub> particles, will be hygroscopic growth under the environment where the relative humidity is more than 60%, so the measured value without the monitoring instrument to control the relative humidity will be virtual high. When the air is relatively dry, gaseous precursor pollutants could not obviously affect visibility. But in the presence of water molecules, polyphase chemical reactions occurs, and gaseous precursors are oxidized in water droplets or in water carried by particulate matters, accelerating the formation of particulate matter. The conversion rate of SO<sub>2</sub> and NO<sub>2</sub> into sulfate, nitrate and other particles **increases exponentially with the increase of relative humidity**. Therefore, higher humidity provides a favorable environment for the hygroscopic growth of aerosol particles, which is conducive to the formation of haze pollution and decreasing of visibility.

**What we simply mean to say is the hygroscopic growth of aerosol particles highly reduced the visibility and enhanced the intensity of haze pollution**, rather than impacting the concentration of PM<sub>2.5</sub>. In the revised version, we corrected the sentence to avoid confusions.

***Revision:***

**Lines 173-175:** Physically, the weakening surface winds and strong thermal inversion corresponded to weaker dispersion conditions, and the higher humidity indicated a favorable environment for the hygroscopic growth of aerosol particles to evidently decrease the visibility.

**5.3 Can you calculate approximate ventilation rates for the boundary layer in the different meteorological conditions, or otherwise increase the level of quantitative detail in lines 140-150, which are currently very qualitative? Can this be used to back up the conclusions about PM<sub>2.5</sub>? For example, the regression of PM<sub>2.5</sub> against “BLH, wind speed, SAT and humidity” done in Yin and Zhang (2020) looks like a nice technique to understand the relationship of air pollution and meteorology, could you do the same thing here for 2020 data? Or at least provide similar numerical detail for what is the BL height and how it varies in the years studied? Is there a role for sea surface temperature here also?**

**Reply:**

Thank you for this nice comment. Following it, we not only show more quantitative results, but also **statistically (with observations and regressions) verified** the percentage of changed PM<sub>2.5</sub> due to the difference in meteorology between 2017 and 2020. We have **added more quantitative analysis** in the revised presentations.

(1) In February 2020, the correlation coefficients of daily PM<sub>2.5</sub> and BLH, relative humidity, wind speed and SAT in North China were **-0.63, 0.44, -0.45 and 0.46** respectively, all of which **passed the 95% significance test**. Compared with the climate mean status (February 2017), in February 2020 BLH **decreased by 19.5m (34.5m)**, relative humidity **increased by 5% (10.6%)**, and SAT **rose by 1.6°C (0.9°C)** after detrending, which are conducive to the increase of PM<sub>2.5</sub> concentration.

(2) We used the meteorological data of boundary layer height, relative humidity, surface temperature and wind speed in February 2017 to establish a multiple linear regression equation to fit PM<sub>2.5</sub>. The correlation coefficients between the fitting results and the actual PM<sub>2.5</sub> concentration in North China, Yangtze River Delta and Hubei reached 0.84, 0.64 and 0.65, all of which **passed the 99% significance test**. Then, we put the **observed meteorological data in February 2020** into the established multiple regression equation to get the predicted PM<sub>2.5</sub> concentration. Using the regression-predicted value, the percentage of changed PM<sub>2.5</sub> due to the difference between in meteorology between 2017 and 2020 were re calculated and is 20.7%, -3.2% and 9.5% in NC, YRD and HB, respectively (the hollow column in Figure S2), **which is consistent with and enhanced the robustness of the results obtained by our previous model simulation.**

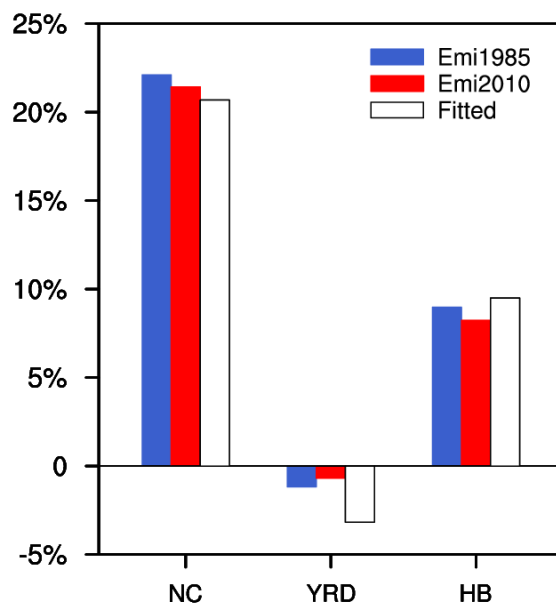

**Figure S2.** The percentage of changed  $PM_{2.5}$  due to the difference in meteorology between 2020 and 2017 by simulated  $PM_{2.5}$  with 2010 (red) and 1985 (blue) emission, and regress-fitted  $PM_{2.5}$  (hollow). The GEOS-Chem simulations were driven by meteorological conditions in 2017 and 2020 under fixed emissions in 1985 and 2010. The regress-fitted  $PM_{2.5}$  was calculated by putting the observed meteorological data in February 2020 into the multiple regression equation fitting  $PM_{2.5}$  established by meteorological data in February 2017.

**Revision:**

**Lines 175-186:** Compared with the climate (February 2017) monthly mean, boundary layer height (BLH) decreased by 19.5m (34.5m), surface relative humidity (rh<sub>um</sub>) increased by 5% (10.6%) and surface air temperature (SAT) rose by 1.6°C (0.9°C) after detrending, which were conducive to the increase of  $PM_{2.5}$  concentration in February 2020. Furthermore, the correlation coefficients of daily  $PM_{2.5}$  and BLH, rh<sub>um</sub>, wind speed and SAT in North China were -0.63, 0.44, -0.45 and 0.46, respectively, all of which passed the 95% significance test and indicated importance of meteorology. We used the meteorological data in February 2017 to establish a multiple linear regression equation to fit  $PM_{2.5}$ . The correlation coefficients between the fitting results and the observed  $PM_{2.5}$  concentration in NC, YRD and HB reached 0.84, 0.64 and 0.65, exceeding the 99% significance test. Then, we put the observed meteorological data in February 2020 into this established multiple regression equation to get the predicted

PM<sub>2.5</sub> concentration. Using the regress-predicted value, the percentage of changed PM<sub>2.5</sub> due to the differences in Meteorology between 2017 and 2020 were re-calculated and is 20.7%, -3.2% and 9.5% in NC, YRD and HB, respectively (Figure S2), which is consistent with and enhanced the robustness of the results obtained by our previous model simulation.

#### **5.4 Line 160-165 can you estimate, with quantitative justification, uncertainty ranges for these numbers?**

##### ***Reply:***

We analyzed and discussed the **source of uncertainties**, and also **give the range of bias of GEOS-Chem model simulation**, but the specific range of final uncertainties of is difficult to estimate. Instead, **we can take a step back to give a more comprehensive source of uncertainty in the discussion section** (Lines 258-274).

(1) There is **a certain bias in the simulation by GEOS-Chem model**, and the biases also showed regional differences, which requires further numerical experiments when the emission inventory is updated.

(2) During the calculation process, the observed PM<sub>2.5</sub> difference in February 2020 was linearly decomposed into three parts. Although this **linear decomposition was reasonable in China in the past few years**, but this approximation was lack of considering the meteorology-emission interactions, the product of the emission, the loss lifetime and particularly the sulfate-nitrate-ammonia thermodynamics (Cai et al., 2017), which brought some uncertainties

(3) The calculation result of the impact of meteorology is **obtained by numerical simulations**, with certain uncertainty. When calculating the expected routine emission reduction in 2020, we use the method of extrapolation. Although the result is consistent with others observational and numerical studies, it is still conjectures rather than true values.

To restrict the possible uncertainties, we **set up some constraints**: 1. The pivotal contribution ratio of changing meteorology were calculated **under two emission levels and recalculated by statistical regressed model**; 2. The values of PM<sub>dM</sub> and PM<sub>dR</sub> were widely **compared to previous studies**.

***Revision:***

**Lines 258-274:** Because of the common update delay of the emission inventory, we employed a combined analysis consisting of observational and numerical methods. We strictly demonstrated the rationality of this method and the results, mainly based on the relatively constant contribution ratio of changing meteorology from GEOS-Chem simulations under the different emissions (Yin and Zhang, 2020). However, there was a certain bias in the simulations by GEOS-Chem model, and the biases also showed regional differences (Dang and Liao, 2019). Therefore, gaps between the assessed results and reality still exist, which requires further numerical experiments when the emission inventory is updated. Furthermore, during the calculation process, the observed PM<sub>2.5</sub> difference in February 2020 was linearly decomposed into three parts. Although this linear decomposition was reasonable in China in the past few years, we must note that this approximation was lack of considering the meteorology-emission interactions, the product of the emission, the loss lifetime and particularly the sulfate-nitrate-ammonia thermodynamics (Cai et al., 2017), which brought some uncertainties. The actual emission reduction effect is considerable (Fig. 3d), in line with the increasingly strengthened emission reduction policies in recent years. When calculating the PM<sub>dR</sub> in 2020, we use the method of extrapolation. Although the result is consistent with others observational and numerical studies (Geng et al., 2019; Zhang et al., 2020; Zhou et al., 2019), it is still conjectures rather than true values. These issues need to be examined in the future studies to unlock respective effects of emissions and meteorological conditions on PM<sub>2.5</sub> over eastern China. To restrict the possible uncertainties, we set up some constraints: 1. The pivotal contribution ratio of changing meteorology were calculated under two emission levels and recalculated by statistical regressed model; 2. The values of PM<sub>dM</sub> and PM<sub>dR</sub> were widely compared to previous studies.

**5.5 Line 169 – the impacts of COVID-19 quarantines on air quality was weaker south of 30N. This is an interesting conclusion. Could it be related to meteorological differences? Is this consistent with the later statement that in north China, secondary aerosol concentrations increase when primary aerosols decrease?**



Is that true in south China?

5.6 Line 176 what are the reasons for the regional differences?

*Reply:*

The south of 30N is less polluted than the north region, therefore the **background of basic PM<sub>2.5</sub> concentration is relatively low (Figure S4a)**. In addition, meteorological conditions in the south in February 2020 **had no positive contribution** relative to that in February 2017, which would not lead to the increase of PM<sub>2.5</sub> concentration. Both of the above two reasons resulted in **a smaller space for PM<sub>2.5</sub> decrease**. So the PM<sub>2.5</sub> concentration that can be reduced by COVID-19 in the south is **not as large as that in North China**, and had regional differences.

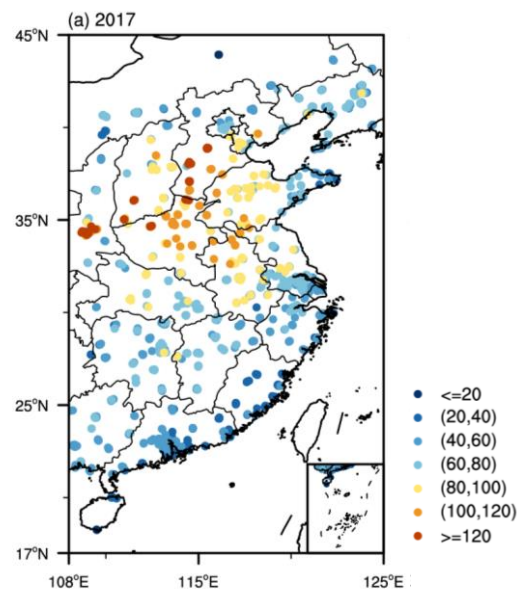

**Figure S4a.** Observed PM<sub>2.5</sub> concentrations (unit:  $\mu\text{g}/\text{m}^3$ ) in February 2017.

*Revision:*

**Lines 209-212:** Generally, the south region was less polluted than the north, therefore the baseline of PM<sub>2.5</sub> concentration was relatively lower (Fig. S4a). In addition, meteorological conditions in the south in February 2020 had no positive contribution (Fig. 3a), which would not lead to the increase of PM<sub>2.5</sub> concentration. These two possible reasons resulted in a smaller space for PM<sub>2.5</sub> decrease due to COVID-19 quarantines in the south and accompanying regional differences.

## 6. Conclusions

**6.1 Line 227-240** It is valuable to point out these shortcomings and qualifications for your study. Can you take this further by estimating uncertainties as I suggest above, and speculate what the effect of the interactions between emissions and meteorology would be?

### *Reply:*

We can discuss and **make a comprehensive summary of the source of uncertainty** in lines 258-274, but the specific range of uncertainty is difficult to calculate (closely connected with comment 5.4).

About the interaction between emissions and meteorology, it is far away from the topic of this manuscript and we clearly pointed out **this is a new question** in the Section Discussion. Possibly, we solve this question in the near future.

### *Revisions:*

**Lines 278-280:** Although the PM<sub>2.5</sub> dropped much, marked air pollutions also occurred during this unique experiments that the human emissions were sharply closed. This raised new scientific questions, such as changes of atmospheric heterogeneous reactions and oxidability under extreme emission control, quantitative meteorology-emission interactions, and so on.

**6.2 What are the implications of the study for the practice of atmospheric chemistry and physics, beyond those of Yin and Zhang (2020)? Please spell these out in the conclusion.**

### *Reply:*

(1) If the COVID-19 epidemic did not occur, the concentrations of PM<sub>2.5</sub> would **increase up to 1.3–1.7 times** the observations in February 2020. Therefore, the **pollution abatement must continue**. Because of the huge population base in the east of China, the anthropogenic emissions exceeded the atmospheric environmental capacity even during COVID-19 quarantines.

(2) Although the PM<sub>2.5</sub> dropped much, marked air pollutions **also occurred** during this unique experiments that the human emissions were sharply closed. This raised new scientific questions, such as changes of atmospheric heterogeneous reactions and

oxidability under extreme emission control, quantitative meteorology-emission interactions, and so on. We have added these implications in the Section Conclusion.

**Revision:**

**Lines 275-280:** If the COVID-19 epidemic did not occur, the concentrations of PM<sub>2.5</sub> would increase up to 1.3–1.7 times the observations in February 2020 (Figure 6). Therefore, the pollution abatement must continue. Because of the huge population base in the east of China, the anthropogenic emissions exceeded the atmospheric environmental capacity even during COVID-19 quarantines. Although the PM<sub>2.5</sub> dropped much, marked air pollutions also occurred during this unique experiment that the human emissions were sharply closed. This raised new scientific questions, such as changes of atmospheric heterogeneous reactions and oxidability under extreme emission control, quantitative meteorology-emission interactions, and so on.

**7.1 Figure 1: what is the significance of the red color on the left side of subfigure a)?**

**Reply:**

The **red bars** indicate an **increase** in existing confirmed cases, and the **blue bars** indicate a **decrease**. We make this significance clear in the caption of Figure 1 (a).

**Revision:**

**Line 414:** Figure 1. (a) Variation in existing confirmed cases (bar; red: increase, blue: decrease) and the ratio of accumulated confirmed cases to total confirmed cases (black line) in China.....

**7.2 Figure 3: state that these figures show simulated data. What is responsible for the increases on the far left of Figure 3c?**

**Reply:**

These figures are calculated from **observation data combined with model simulated data**, which mainly depends on the observation data. To avoid confusions, some revisions were included: (1) we have also changed these figures to **be represented as sites**, which are closer to the meaning of the calculation method; (2) In Sec. 2.3, we clearly illustrated the calculations were **based on an observational-**

### numerical hybrid method.

In the Method and Discussion, we discussed some possible uncertainties. These increases on the far left were **a sort of uncertainties**. These increases were tiny and insignificant, and definitely do **not affected the main results** of our study.

### *Revision:*

**Lines 109-110:** As mentioned above, we aimed to examine the impact of the COVID-19 quarantines on PM<sub>2.5</sub> over the February 2017 level basing on an observational-numerical hybrid method.

**Figure 3.**

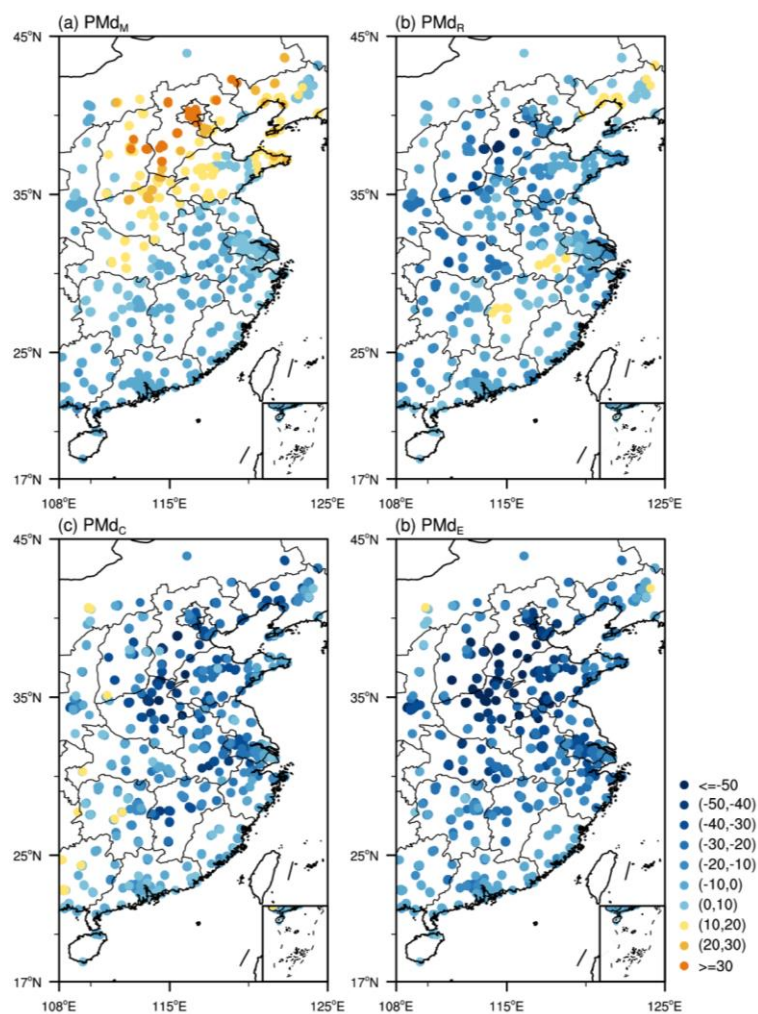

**Figure 3.** PM<sub>2.5</sub> difference (unit:  $\mu\text{g}/\text{m}^3$ ) in February between 2020 and 2017 due to (a) changing meteorology (PM<sub>dM</sub>), (b) expected routine emission reductions (PM<sub>dR</sub>), (c) the COVID-19 quarantines (PM<sub>dC</sub>), and (d) due to the total emission reduction (PM<sub>dE</sub> = PM<sub>dR</sub> + PM<sub>dC</sub>).

### 7.3 Figure 4 please label color bars with units

**Reply:**

We have added the units to the color bar.

**Revision:**

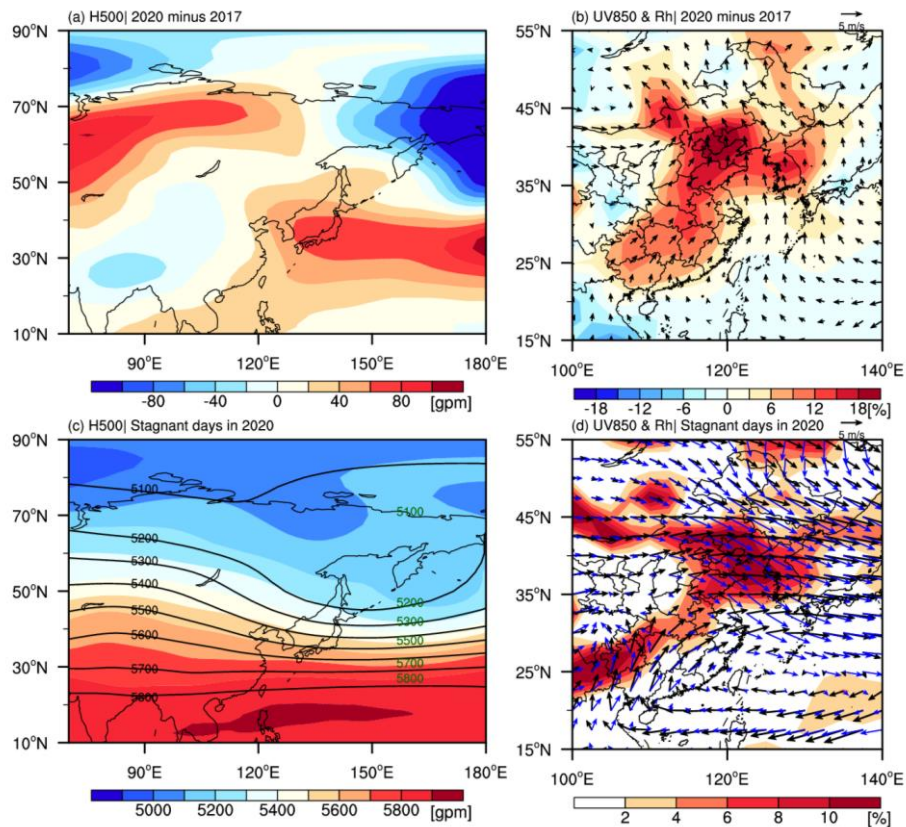

**Figure 4.** Differences in the observed atmospheric circulation in February between 2020 and 2017, including (a) geopotential potential height at 500 hPa (unit: gpm), (b) wind at 850 hPa (arrows; unit: m/s), surface relative humidity (shading; unit: %). The atmospheric circulations in the stagnant days (e.g., from 8–13 and 19–25 February 2020) were also showed, including (c) geopotential potential height at 500 hPa (shading) and its climate mean in February (contour), and (d) wind at 850 hPa (black arrows), its climate mean (blue arrows) and the increased surface relative humidity (shading, stagnant days minus climate mean).
